# Supplementary material
Source: MDPI journal article supplement (https://www.mdpi.com/search?q=molbank-2021-M1268)
Supplement: s002 [file molbank-2021-M1268-s002.inchi]

InChI=1/C22H18BrN3OS/c23-18-11-13-19(14-12-18)26-21(17-9-5-2-6-10-17)24-25-22(26)28-15-20(27)16-7-3-1-4-8-16/h1-14,20,27H,15H2/t20-/s2
AuxInfo=1/0/N:26,16,25,27,15,17,24,28,14,18,10,12,9,13,19,23,6,11,8,20,4,1,22,3,2,5,21,7/E:(3,4)(5,6)(7,8)(9,10)(11,12)(13,14)/rA:28CNNCNCSCCCCCCCCCCCCC.oOBrCCCCCC/rB:d1;s2;d3;s1s4;s4;s1;s5;s8;d9;s10;d11;d8s12;s6;d14;s15;d16;d6s17;s7;s19;P20;s11;s20;s23;d24;s25;d26;d23s27;/rC:-.5261,.7265,.3291;.4861,-.1025,.227;.0099,-1.3728,.4617;-1.2772,-1.2774,.6992;-1.6558,.0279,.6256;-2.0903,-2.3032,.9714;-.4337,2.5258,.109;-2.8195,.4959,.7976;-3.479,1.1296,-.2555;-4.7611,1.6453,-.066;-5.3836,1.5271,1.1766;-4.7242,.8934,2.2297;-3.4421,.3778,2.0402;-1.5556,-3.5478,1.3039;-2.404,-4.618,1.5877;-3.787,-4.4435,1.5391;-4.3217,-3.1989,1.2067;-3.4733,-2.1287,.9228;1.3486,2.5199,-.2342;1.8225,3.9453,-.4859;1.5681,4.7301,.6477;-7.1126,2.2226,1.4322;3.2927,3.9391,-.7679;3.7711,4.4215,-1.9861;5.141,4.4156,-2.2489;6.0323,3.9274,-1.2935;5.5539,3.445,-.0754;4.184,3.4509,.1874;
