# Supplementary material
Source: MDPI journal article supplement (https://www.mdpi.com/search?q=molbank-2021-M1268)
Supplement: s002 [file molbank-2021-M1268-s002.mol]

 OpenBabel05132120263D

 28 31  0  0  0  0  0  0  0  0999 V2000
   -0.5261    0.7265    0.3291 C   0  0  0  0  0  0  0  0  0  0  0  0
    0.4861   -0.1025    0.2270 N   0  0  0  0  0  0  0  0  0  0  0  0
    0.0099   -1.3728    0.4617 N   0  0  0  0  0  0  0  0  0  0  0  0
   -1.2772   -1.2774    0.6992 C   0  0  0  0  0  0  0  0  0  0  0  0
   -1.6558    0.0279    0.6256 N   0  0  0  0  0  0  0  0  0  0  0  0
   -2.0903   -2.3032    0.9714 C   0  0  0  0  0  0  0  0  0  0  0  0
   -0.4337    2.5258    0.1090 S   0  0  0  0  0  0  0  0  0  0  0  0
   -2.8195    0.4959    0.7976 C   0  0  0  0  0  0  0  0  0  0  0  0
   -3.4790    1.1296   -0.2555 C   0  0  0  0  0  0  0  0  0  0  0  0
   -4.7611    1.6453   -0.0660 C   0  0  0  0  0  0  0  0  0  0  0  0
   -5.3836    1.5271    1.1766 C   0  0  0  0  0  0  0  0  0  0  0  0
   -4.7242    0.8934    2.2297 C   0  0  0  0  0  0  0  0  0  0  0  0
   -3.4421    0.3778    2.0402 C   0  0  0  0  0  0  0  0  0  0  0  0
   -1.5556   -3.5478    1.3039 C   0  0  0  0  0  0  0  0  0  0  0  0
   -2.4040   -4.6180    1.5877 C   0  0  0  0  0  0  0  0  0  0  0  0
   -3.7870   -4.4435    1.5391 C   0  0  0  0  0  0  0  0  0  0  0  0
   -4.3217   -3.1989    1.2067 C   0  0  0  0  0  0  0  0  0  0  0  0
   -3.4733   -2.1287    0.9228 C   0  0  0  0  0  0  0  0  0  0  0  0
    1.3486    2.5199   -0.2342 C   0  0  0  0  0  0  0  0  0  0  0  0
    1.8225    3.9453   -0.4859 C   0  0  1  0  0  0  0  0  0  0  0  0
    1.5681    4.7301    0.6477 O   0  0  0  0  0  0  0  0  0  0  0  0
   -7.1126    2.2226    1.4322 Br  0  0  0  0  0  0  0  0  0  0  0  0
    3.2927    3.9391   -0.7679 C   0  0  0  0  0  0  0  0  0  0  0  0
    3.7711    4.4215   -1.9861 C   0  0  0  0  0  0  0  0  0  0  0  0
    5.1410    4.4156   -2.2489 C   0  0  0  0  0  0  0  0  0  0  0  0
    6.0323    3.9274   -1.2935 C   0  0  0  0  0  0  0  0  0  0  0  0
    5.5539    3.4450   -0.0754 C   0  0  0  0  0  0  0  0  0  0  0  0
    4.1840    3.4509    0.1874 C   0  0  0  0  0  0  0  0  0  0  0  0
  1  2  2  0  0  0  0
  1  7  1  0  0  0  0
  2  3  1  0  0  0  0
  4  3  2  0  0  0  0
  4  5  1  0  0  0  0
  4  6  1  0  0  0  0
  5  1  1  0  0  0  0
  5  8  1  0  0  0  0
  6 14  1  0  0  0  0
  6 18  2  0  0  0  0
  7 19  1  0  0  0  0
  8  9  1  0  0  0  0
  8 13  2  0  0  0  0
  9 10  2  0  0  0  0
 10 11  1  0  0  0  0
 11 12  2  0  0  0  0
 11 22  1  0  0  0  0
 12 13  1  0  0  0  0
 14 15  2  0  0  0  0
 15 16  1  0  0  0  0
 16 17  2  0  0  0  0
 17 18  1  0  0  0  0
 19 20  1  0  0  0  0
 20 21  1  1  0  0  0
 20 23  1  0  0  0  0
 23 24  1  0  0  0  0
 23 28  2  0  0  0  0
 24 25  2  0  0  0  0
 25 26  1  0  0  0  0
 26 27  2  0  0  0  0
 27 28  1  0  0  0  0
M  END
